# Supplementary material for: Green and facile synthesis of highly biocompatible carbon nanospheres and their pH-responsive delivery of doxorubicin to cancer cells
Source: Royal Society of Chemistry journal article supplement (doi:10.1039/c4ra16359a), 2015-01-01
Supplement: c4ra16359a1.pdf [file c4ra16359a1.pdf]

# Green and Facile Synthesis of Highly Biocompatible Carbon Nanospheres and its pH Responsive Delivery of Doxorubicin to Cancer Cells

Xiaoli Liu, Hui Jiang, Wei Ge, Changyu Wu, Donghua Chen, Qiwei Li, Yun Chen, and Xuemei Wang\*

State Key Laboratory of Bioelectronics (Chien-Shiung Wu Laboratory), Department of  
Biological Science and Medical Engineering, Southeast University, Nanjing 210096, China.

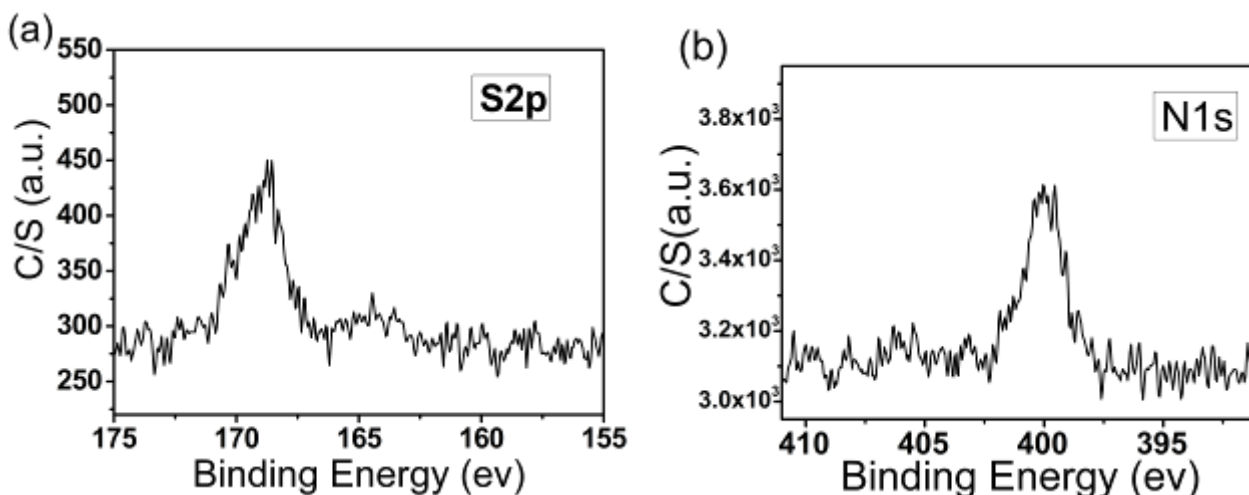

**Figure S1.** (a) High-resolution S2p spectrum; (b) High-resolution N1s spectrum.

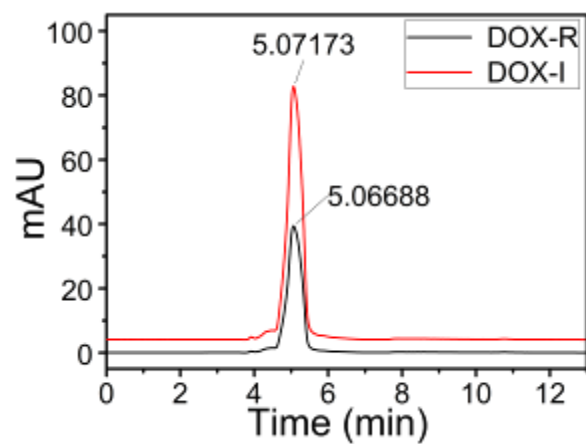

**Figure S2.** C18-HPLC chromatogram of DOX standard (*i.e.*, DOX-I) and DOX released from CNS (*i.e.*, DOX-R) (UV 490nm).

**Table S2.** Details of the concentrations of CNS, free DOX, and DOX-CNS in Figure. 6

|                              | CNS  | Free DOX | DOX-CNS |
|------------------------------|------|----------|---------|
| C5 ( $\mu\text{g mL}^{-1}$ ) | 1.11 | 1        | 2.11    |
| C4 ( $\mu\text{g mL}^{-1}$ ) | 0.56 | 0.5      | 1.06    |
| C3 ( $\mu\text{g mL}^{-1}$ ) | 0.28 | 0.25     | 0.53    |
| C2 ( $\mu\text{g mL}^{-1}$ ) | 0.14 | 0.13     | 0.27    |
| C1 ( $\mu\text{g mL}^{-1}$ ) | 0.07 | 0.06     | 0.13    |
